# Supplementary material
Source: PubMed Central journal article supplement (PMC3419927)
Supplement: emboj2012188s2.pdf [file emboj2012188s2.pdf]

Image 59

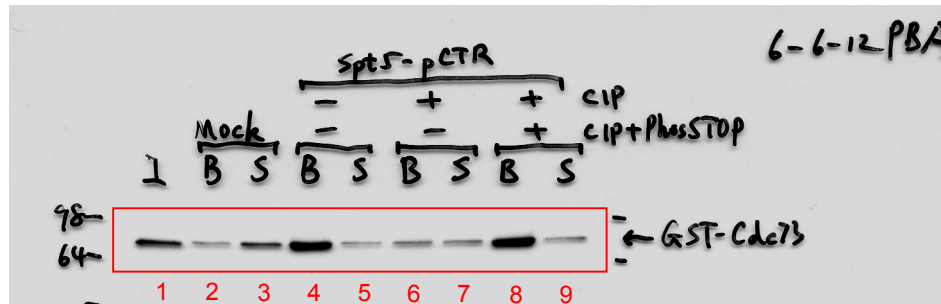

Image 60

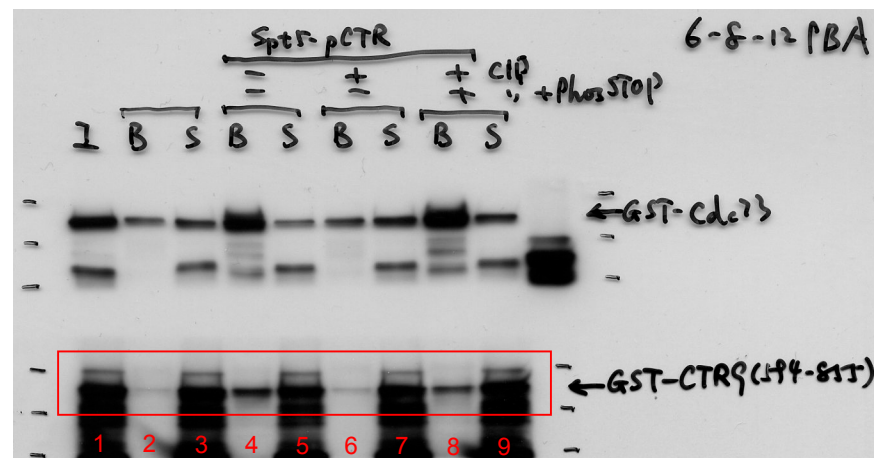

Boxed lanes are numbered and labeled as they appear in  
**Fig. 2B of 3rd revision of the manuscript**

The experiments on GST-Cdc73 on Images 59-60 are replicate trials and the Image 59 results were chosen for presentation because the exposure more closely matches Fig. 2B in the original manuscript.

Image 58

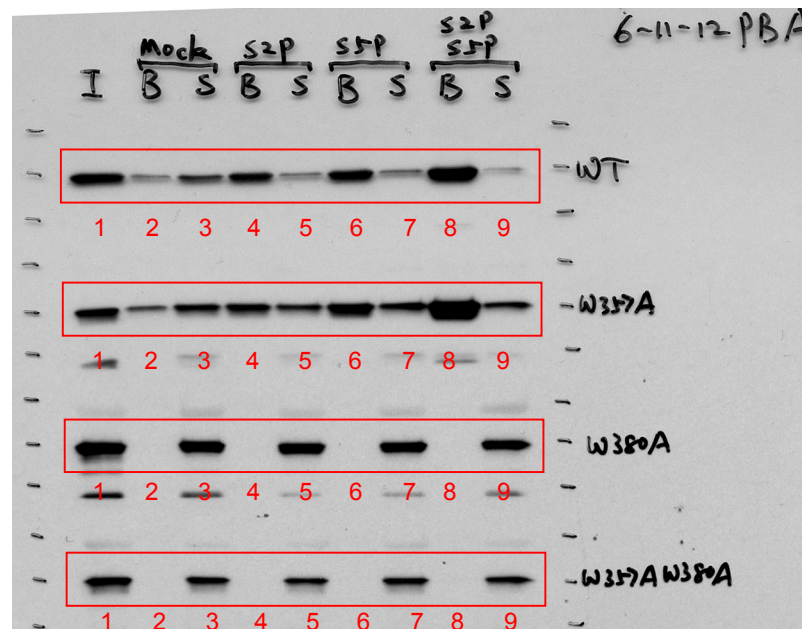

Boxed lanes are numbered and labeled as they appear in Fig. 3B of 3rd revised manuscript.

Image 36

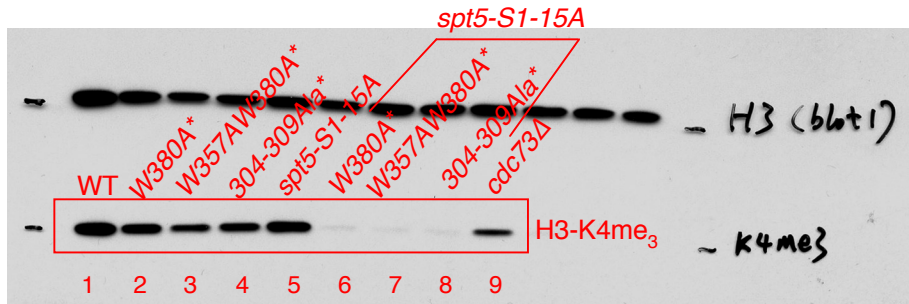

Image 37

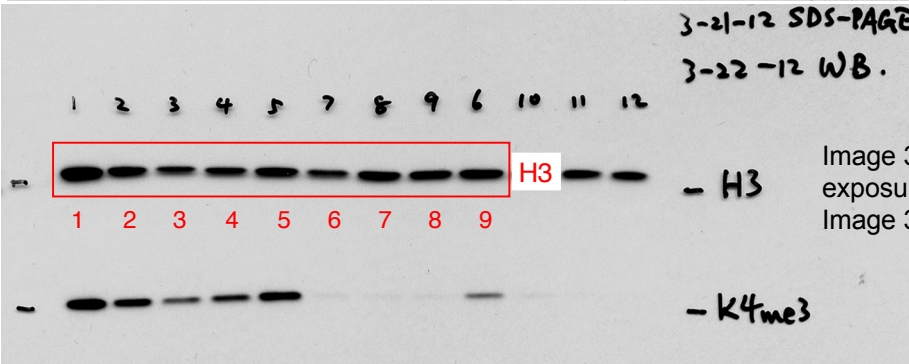

Boxed lanes in Images 36-37 are numbered and labeled as they appear in Fig. 7B of 3rd revised manuscript

Image 38

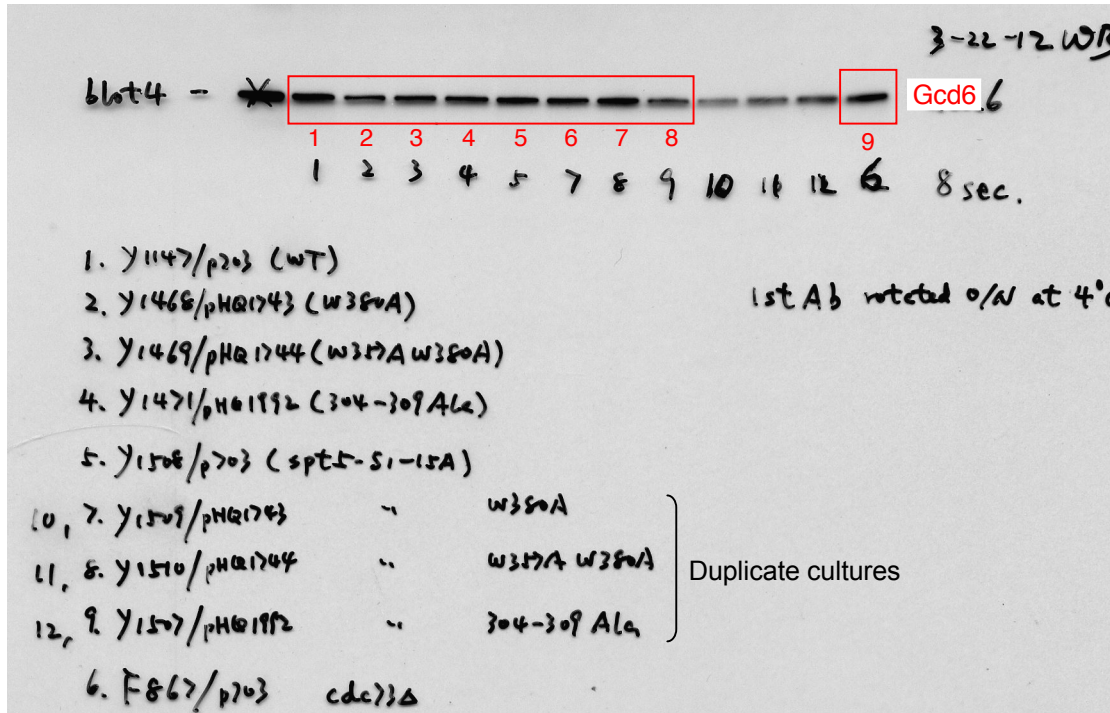

Boxed lanes in Images 38 appeared in Fig. 7B of 2nd revised manuscript and are replaced with the boxed lanes in Image 39.

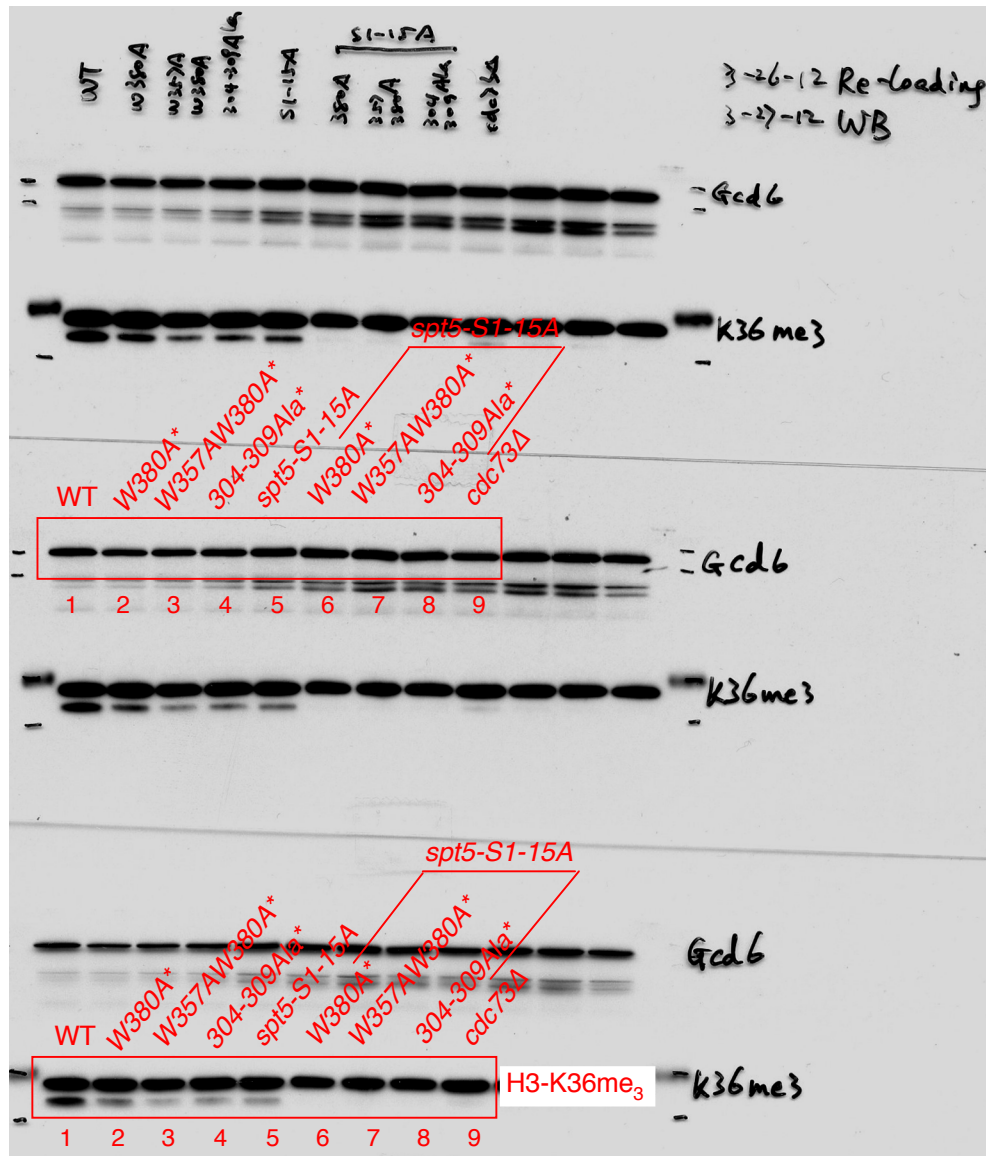

Image 39

Boxed lanes in Images 39 are numbered and labeled as they appear in Fig. 7B of 3rd revised manuscript
